# Supplementary material for: HKUST-1 as an open metal site gas chromatographic stationary phase—capillary preparation, separation of small hydrocarbons and electron donating compounds, determination of thermodynamic data
Source: Royal Society of Chemistry journal article supplement (doi:10.1039/c2jm15596f), 2012-01-01
Supplement: c2jm15596f.pdf [file c2jm15596f.pdf]

Supplementary Information

HKUST-1 as an Open Metal Site Gas Chromatographic Stationary Phase – Capillary Preparation,  
Separation of Small Hydrocarbons and Electron Donating Compounds, Determination of  
Thermodynamic Data

Alexander S. Münch and Florian O. R. L. Mertens

Institute of Physical Chemistry, Technical University Bergakademie Freiberg, Leipziger Straße 29, 09599 Freiberg,  
Germany

Bulk synthesis of HKUST-1 using the controlled SBU approach

General bulk synthesis at different temperatures. 0.299 g (1.5 mmol) copper(II) acetate monohydrate (Acros Organics, >98 %), called CuAc, was dissolved in 25 ml deionised water and heated to a temperature of 298 K, 333 K, and 373 K. In the next step a solution of 0.210 g (1 mmol) benzene-1,3,5-tricarboxylic acid (ABCR, 98 %), called H<sub>3</sub>BTC, dissolved in 25 ml ethanol (VWR, > 99,8 %) was dropwise added to every precursor solution. Afterwards the suspension was stirred for 1 hr at the chosen temperature, cooled down to room temperature, and stirred again for 12 hrs. The blue solids were filtered off and washed with ethanol and diethyl ether (VWR, > 99,7 %). For activation the HKUST-1 material was heated at 373 K under vacuum. From the procedure described, a dark blue powder was obtained.

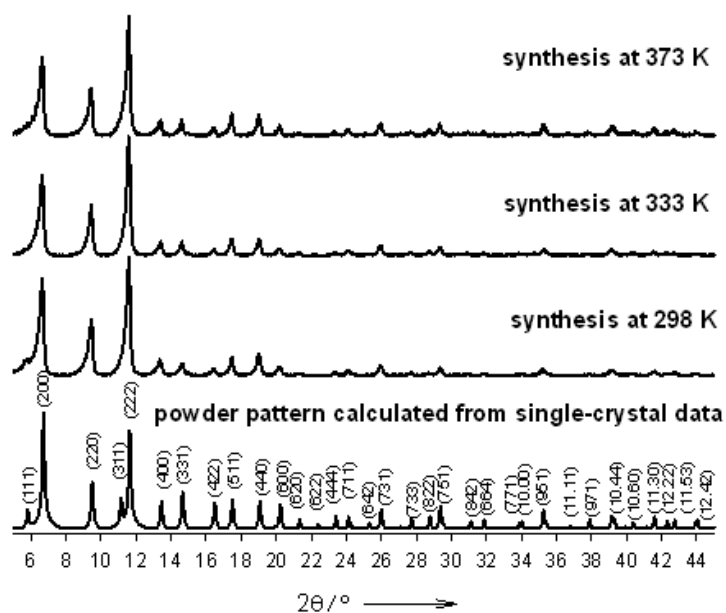

**Supporting Fig. 1** Powder X-ray diffractogrammes of HKUST-1 synthesised at different temperatures in comparison with the powder pattern simulated from single crystal data of HKUST-1.

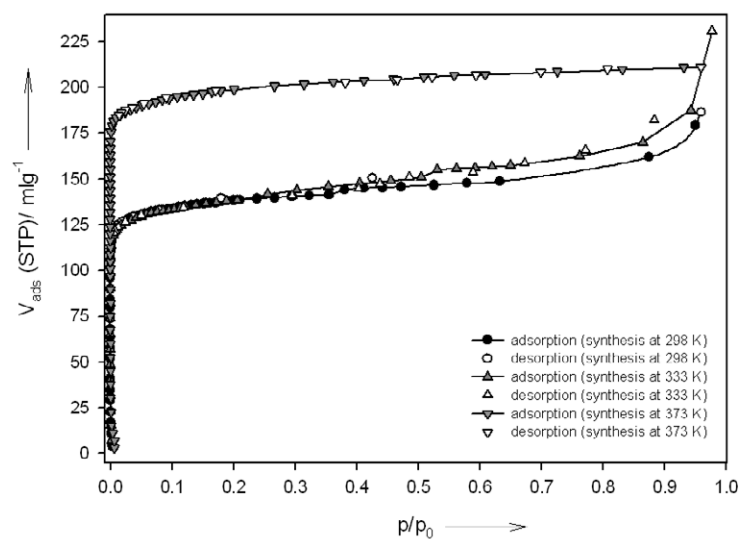

**Supporting Fig. 2** Nitrogen adsorption isotherms of different HKUST-1 materials synthesised at 298 K, 333 K, and 373 K.

**Supporting Table 1** Comparison of surface areas values of different HKUST-1 materials synthesised at 298 K, 333 K, and 373 K.

|                    | A(BET) in m <sup>2</sup> /g | A(BET) <sub>Snurr</sub> in m <sup>2</sup> /g |
|--------------------|-----------------------------|----------------------------------------------|
| synthesis at 298 K | 418                         | 547                                          |
| synthesis at 333 K | 435                         | 540                                          |
| synthesis at 373 K | 603                         | 804                                          |

Investigations of the influence of the SBU precursor concentration on HKUST-1 formation.

According to the protocol for the bulk synthesis above, a 0.04 mol/L solution of H<sub>3</sub>BTC in ethanol was dropwise added to a (i) 0.001 mol/L, (ii) 0.005 mol/L, (iii) 0.01 mol/L, (iv) 0.06 mol/L, (v) 0.1 mol/L, (vi) 0.15 mol/L, and (vii) 0.25 mol/L aqueous solution of CuAc at room temperature. After a stirring for 1 hr, blue crystalline material was filtered off from the mixture and activated as described in the bulk synthesis section.

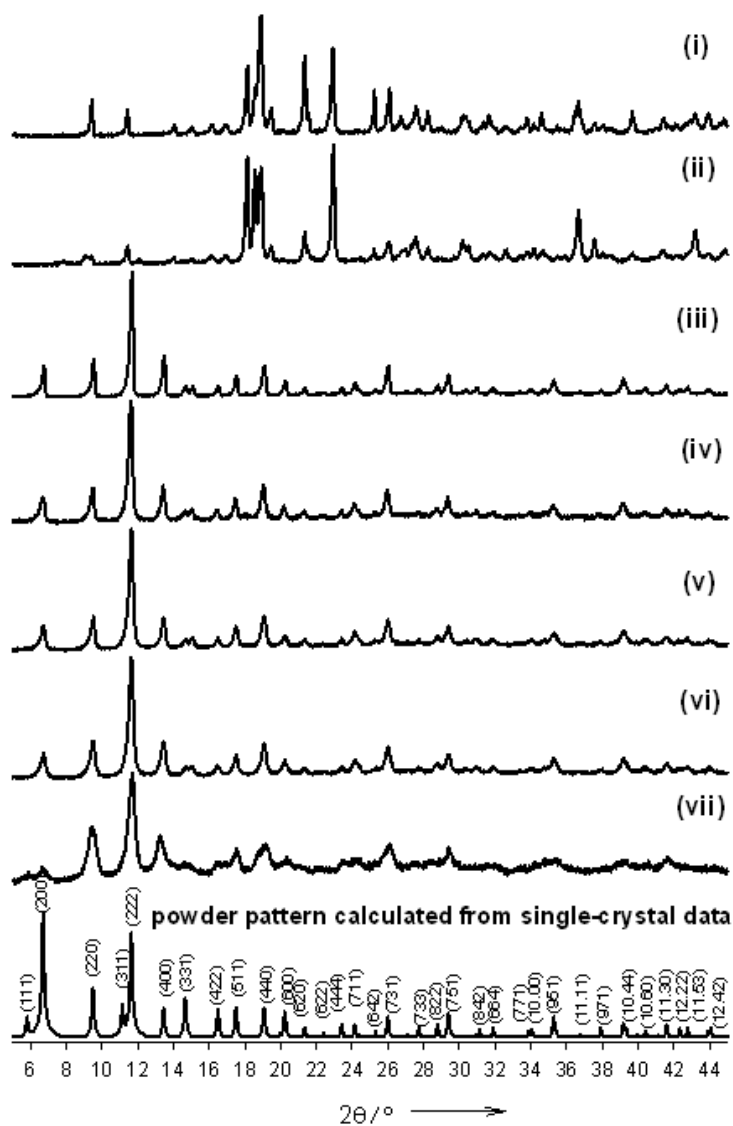

**Supporting Fig. 3** Comparison of the powder X-ray diffractograms of materials, which were synthesised using the standard protocol (see above) for the HKUST-1 bulk synthesis with different CuAc concentrations.

#### Investigation of solvent effects.

The protocol of the HKUST-1 synthesis above was altered in respect to the solvents used. In each case the linker solution was slowly added to the stirred precursor solution at room temperature. After a stirring time of 1 hr the blue solid material formed was filtered off from the solution. The material was subsequently activated. The following concentrations and solvents were used: (i) 0.06 mol/L of CuAc and 0.04 mol/L of H<sub>3</sub>BTC in dioxane (Merck, > 99 %), (ii) 0.06 mol/L of CuAc and 0.6 mmol/L of H<sub>3</sub>BTC in deionised water, (iii) 0.06 mol/L of CuAc and 0.04 mol/L of H<sub>3</sub>BTC in acetone (VWR, > 99.8 %) the addition of ethanol caused in this case the precipitation HKUST-1 material, (iv) 0.06 mol/L of CuAc and 0.04 mol/L of H<sub>3</sub>BTC in *N,N*-dimethylformamide (Carl Roth, ≥ 99.5 %) also in this case, the addition of ethanol caused the precipitation HKUST-1 material, and (v) 0.06 mol/L of CuAc in deionised water and 0.04 mol/L of H<sub>3</sub>BTC in ethanol.

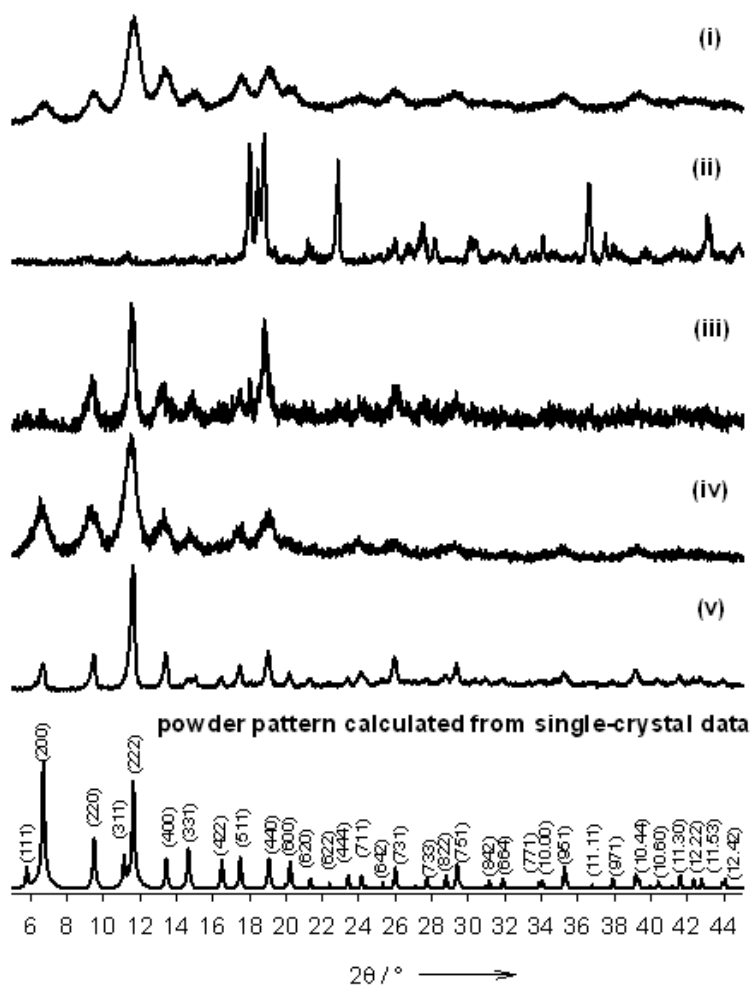

Supporting Fig. 4 Comparison of the powder X-ray diffractograms of materials, which were synthesised using different solvents.

Evaluation of the consistency criterion according to Y.-S. Bae, A. O. Yazaydin and R. Q. Snurr, *Langmuir*, 2010, 26, 5475.

BET consistency plot based on the 77 K N<sub>2</sub> adsorption isotherms of HKUST-1. A positive slope was found in the  $p/p_0$  range from app. 0.005 to 0.03.

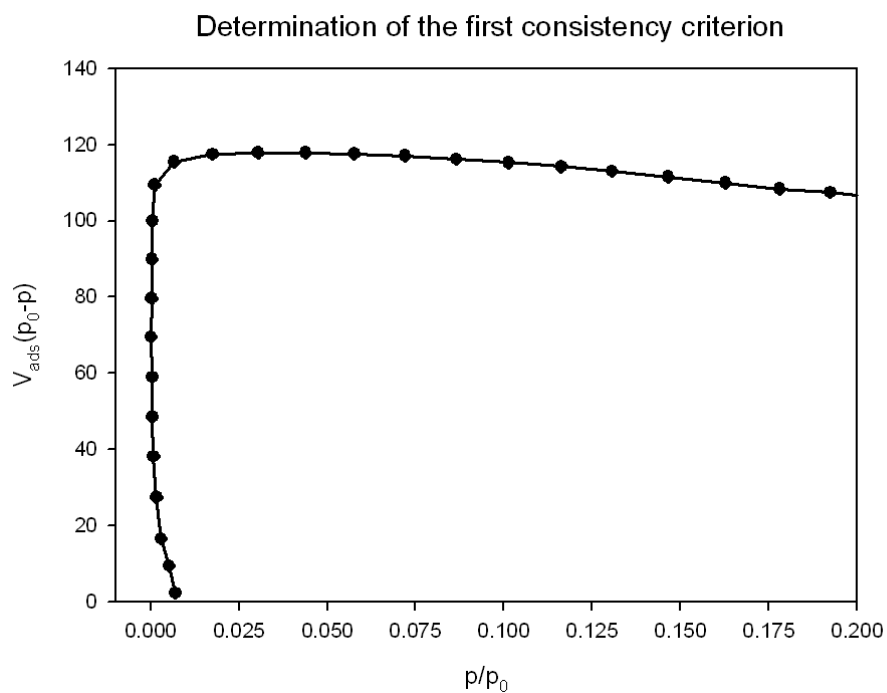

Supporting Fig. 5a

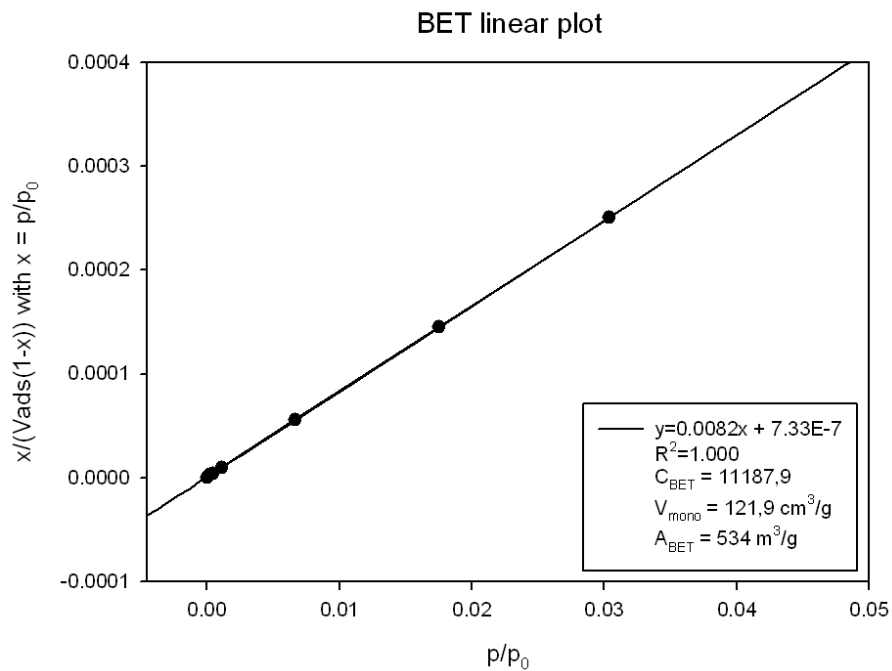

Supporting Fig. 5b
